# Supplementary material for: Changes on the fine sediment dynamics after the Port of Rio Grande expansion
Source: Copernicus journal article supplement (doi:10.5194/adgeo-39-123-2015), 2015-01-14
Supplement: Supplementary file 1 [file adgeo-39-123-2015-supplement.zip]

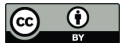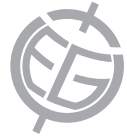

## *Supplement of*

# **Changes on the fine sediment dynamics after the Port of Rio Grande expansion**

**P. D. Silva et al.**

*Correspondence to:*

- [adgeo-39-123-2015-supplement-cover-letter.pdf](#)
- figures
  - [figure\\_1.eps](#)
  - [figure\\_2.eps](#)
  - [figure\\_3.eps](#)
  - [figure\\_4.eps](#)
  - [figure\\_5.eps](#)
  - [figure\\_6.eps](#)
  - [figure\\_7.eps](#)
  - [figure\\_8.eps](#)
